# Supplementary material for: Classification of the Pathological Range of Motion in Low Back Pain Using Wearable Sensors and Machine Learning
Source: MDPI journal article supplement (doi:10.3390/s24030831), 2024-01-27
Supplement: s1 [file s1]

**Table S2.** Raw statistics of the Healthy and Pathological Group.

| Group Statistics                                        |              |    |                 |                 |                 |
|---------------------------------------------------------|--------------|----|-----------------|-----------------|-----------------|
|                                                         | State        | N  | Mean            | Std. Deviation  | Std. Error Mean |
| Flexion-Extension (Frontal axis) total length (°)       | Healthy      | 75 | 104.6099071409  | 25.15439792946  | 2.90457968317   |
|                                                         | Pathological | 75 | 87.2123917451   | 24.98525195654  | 2.88504838858   |
| Flexion-Extension (Frontal axis) angular velocity (°/s) | Healthy      | 75 | 42.01754850973  | 11.838397370221 | 1.366980381694  |
|                                                         | Pathological | 75 | 35.75737557088  | 14.566584623693 | 1.682004310733  |
| Flexion-Extension (Frontal axis) max range (°)          | Healthy      | 75 | 83.9940422404   | 16.27895200765  | 1.87973146475   |
|                                                         | Pathological | 75 | 71.6035092065   | 17.85171657143  | 2.06133867360   |
| Flexion-Extension (Frontal axis) max value (°)          | Healthy      | 75 | 62.1324809656   | 10.75174521944  | 1.24150459934   |
|                                                         | Pathological | 75 | 55.5320776380   | 14.23631007345  | 1.64386749063   |
| Flexion-Extension (Frontal axis) min value (°)          | Healthy      | 75 | -22.56532880041 | 11.029395245058 | 1.273564862747  |
|                                                         | Pathological | 75 | -16.07143156759 | 7.947855977797  | .917739357652   |
| Flexion-Extension (Frontal axis) max speed (°/s)        | Healthy      | 75 | 117.4639676831  | 33.31579127239  | 3.84697621188   |
|                                                         | Pathological | 75 | 91.5928370787   | 37.11871218411  | 4.28609969429   |
| Flexion-Extension (Frontal axis) min speed (°/s)        | Healthy      | 75 | -92.2110028783  | 28.91931819524  | 3.33931522896   |
|                                                         | Pathological | 75 | -84.0193387055  | 30.98899760357  | 3.57830122167   |
| Flexion-Extension (Frontal axis) Speed Harmony (°/s)    | Healthy      | 75 | -.55034578191   | .134103919083   | .015484986756   |
|                                                         | Pathological | 75 | -.59204414396   | .143123430425   | .016526470217   |
| Rotation (Longitudinal axis) total length (°)           | Healthy      | 75 | 98.8218647033   | 18.86494160786  | 2.17833582311   |

|                                                        |                  |    |                    |                     |                |
|--------------------------------------------------------|------------------|----|--------------------|---------------------|----------------|
|                                                        | Pathologica<br>l | 75 | 87.4840263227      | 23.5967980147<br>3  | 2.72472353716  |
| Rotation (Longitudinal<br>axis) angular velocity (°/s) | Healthy          | 75 | 45.1473483475      | 12.1250952090<br>9  | 1.40008539658  |
|                                                        | Pathologica<br>l | 75 | 38.0959401820      | 15.1007953820<br>0  | 1.74368965575  |
| Rotation (Longitudinal<br>axis) max range (°)          | Healthy          | 75 | 78.7188782581      | 12.5042235919<br>5  | 1.44386337136  |
|                                                        | Pathologica<br>l | 75 | 69.3969534108      | 15.5140072686<br>9  | 1.79140325456  |
| Rotation (Longitudinal<br>axis) max value (°)          | Healthy          | 75 | 38.5115326231      | 6.76018816307       | .78059929114   |
|                                                        | Pathologica<br>l | 75 | 34.3978137489      | 8.48850029151       | .98016758566   |
| Rotation (Longitudinal<br>axis) min value (°)          | Healthy          | 75 | -40.2073456361     | 6.70814814281       | .77459022720   |
|                                                        | Pathologica<br>l | 75 | -34.9991396620     | 7.70283269705       | .88944650623   |
| Rotation (Longitudinal<br>axis) max speed (°/s)        | Healthy          | 75 | 96.7213783133      | 25.1477708781<br>5  | 2.90381445720  |
|                                                        | Pathologica<br>l | 75 | 83.3823404319      | 30.6342699625<br>1  | 3.53734080186  |
| Rotation (Longitudinal<br>axis) min speed (°/s)        | Healthy          | 75 | -95.9354483597     | 23.4447702192<br>1  | 2.70716887943  |
|                                                        | Pathologica<br>l | 75 | -81.6118858641     | 29.6099376848<br>9  | 3.41906109861  |
| Rotation (Longitudinal<br>axis) speed harmony (°/s)    | Healthy          | 75 | -.59877726432      | .138512142401       | .015994004540  |
|                                                        | Pathologica<br>l | 75 | -.57702491489      | .139813361347       | .016144256362  |
| Laterization (Sagittal axis)<br>Total Length (°)       | Healthy          | 75 | 98.6878282457      | 17.4901680519<br>0  | 2.01959064659  |
|                                                        | Pathologica<br>l | 75 | 77.9673070824      | 23.9347598778<br>0  | 2.76374801169  |
| Laterization (Sagittal axis)<br>angular velocity (°/s) | Healthy          | 75 | 42.1049414260<br>0 | 9.89484543914<br>6  | 1.142558335576 |
|                                                        | Pathologica<br>l | 75 | 33.6656308828<br>5 | 13.6929787358<br>97 | 1.581128991836 |
| Laterization (Sagittal axis)<br>max range (°)          | Healthy          | 75 | 77.0943477249      | 12.4906836132<br>4  | 1.44229990929  |
|                                                        | Pathologica<br>l | 75 | 61.7832643621      | 16.0226892745<br>1  | 1.85014079316  |

|                              |                  |    |                         |                    |               |
|------------------------------|------------------|----|-------------------------|--------------------|---------------|
| Laterization (Sagittal axis) | Healthy          | 75 | 40.0710514899           | 6.77079003664      | .78182349006  |
| max value (°)                | Pathologica<br>l | 75 | 31.8352556375           | 8.15858808119      | .94207260498  |
| Laterization (Sagittal axis) | Healthy          | 75 | -<br>37.0232962338<br>7 | 6.52419548588<br>1 | .753349204004 |
| min value (°)                | Pathologica<br>l | 75 | -<br>29.9480087247<br>9 | 8.45371527232<br>0 | .976150957625 |
| Laterization (Sagittal axis) | Healthy          | 75 | 79.7717408824           | 19.8586827367<br>8 | 2.29308316477 |
| max speed (°/s)              | Pathologica<br>l | 75 | 64.0221178512           | 25.7235354717<br>8 | 2.97029802583 |
| Laterization (Sagittal axis) | Healthy          | 75 | -80.7410002301          | 20.1645980642<br>9 | 2.32840722410 |
| min speed (°/s)              | Pathologica<br>l | 75 | -65.3123756316          | 24.4778650159<br>4 | 2.82646039123 |
| Laterization (Sagittal axis) | Healthy          | 75 | -.65644624315           | .151417357877      | .017484170466 |
| speed harmony (°/s)          | Pathologica<br>l | 75 | -.67780276156           | .143678263342      | .016590536803 |

**Table S3.** Independent Sample Test from both groups.

| Independent Samples Test                |                                      |                                               |      |                              |             |                        |                        |                                 |                                                 |                         |
|-----------------------------------------|--------------------------------------|-----------------------------------------------|------|------------------------------|-------------|------------------------|------------------------|---------------------------------|-------------------------------------------------|-------------------------|
|                                         |                                      | Levene's Test<br>for Equality of<br>Variances |      | t-test for Equality of Means |             |                        |                        |                                 |                                                 |                         |
|                                         |                                      | F                                             | Sig. | t                            | df          | Sig.<br>(2-<br>tailed) | Mean<br>Differe<br>nce | Std.<br>Error<br>Differe<br>nce | 95% Confidence<br>Interval of the<br>Difference |                         |
|                                         |                                      |                                               |      |                              |             |                        |                        |                                 | Lower                                           | Upper                   |
| Flexion-<br>Extension<br>(Frontal axis) | Equal<br>variances<br>assumed        | .044                                          | .834 | 4.25<br>0                    | 148         | .000                   | 17.3975<br>153958<br>7 | 4.09390<br>856521               | 9.30745<br>059335                               | 25.4875<br>801983<br>8  |
|                                         | Equal<br>variances<br>not<br>assumed |                                               |      | 4.25<br>0                    | 147.<br>993 | .000                   | 17.3975<br>153958<br>7 | 4.09390<br>856521               | 9.30744<br>755777                               | 25.4875<br>832339<br>7  |
| Flexion-<br>Extension<br>(Frontal axis) | Equal<br>variances<br>assumed        | 2.130                                         | .147 | 2.88<br>8                    | 148         | .004                   | 6.26017<br>293885<br>3 | 2.16743<br>485836<br>6          | 1.97705<br>616179<br>5                          | 10.5432<br>897159<br>12 |
|                                         | Equal<br>variances<br>not<br>assumed |                                               |      | 2.88<br>8                    | 142.<br>061 | .004                   | 6.26017<br>293885<br>3 | 2.16743<br>485836<br>6          | 1.97557<br>977929<br>0                          | 10.5447<br>660984<br>17 |
| Flexion-<br>Extension<br>(Frontal axis) | Equal<br>variances<br>assumed        | .181                                          | .671 | 4.44<br>2                    | 148         | .000                   | 12.3905<br>330338<br>7 | 2.78971<br>459236               | 6.87771<br>527713                               | 17.9033<br>507906<br>0  |
|                                         | Equal<br>variances<br>not<br>assumed |                                               |      | 4.44<br>2                    | 146.<br>759 | .000                   | 12.3905<br>330338<br>7 | 2.78971<br>459236               | 6.87733<br>091734                               | 17.9037<br>351504<br>0  |
| Flexion-<br>Extension<br>(Frontal axis) | Equal<br>variances<br>assumed        | 3.926                                         | .049 | 3.20<br>4                    | 148         | .002                   | 6.60040<br>332760      | 2.06000<br>825167               | 2.52957<br>468445                               | 10.6712<br>319707<br>5  |
|                                         | Equal<br>variances<br>not<br>assumed |                                               |      | 3.20<br>4                    | 137.<br>694 | .002                   | 6.60040<br>332760      | 2.06000<br>825167               | 2.52706<br>171194                               | 10.6737<br>449432<br>6  |

|                                                                   |                                      |       |      |                |             |      |                             |                        |                             |                             |
|-------------------------------------------------------------------|--------------------------------------|-------|------|----------------|-------------|------|-----------------------------|------------------------|-----------------------------|-----------------------------|
| Flexion-<br>Extension<br>(Frontal axis)<br>min value (°)          | Equal<br>variances<br>assumed        | 9.142 | .003 | -<br>4.13<br>7 | 148         | .000 | -<br>6.49389<br>723282<br>7 | 1.56978<br>119118<br>8 | -<br>9.59597<br>715478<br>4 | -<br>3.39181<br>731086<br>9 |
|                                                                   | Equal<br>variances<br>not<br>assumed |       |      | -<br>4.13<br>7 | 134.<br>531 | .000 | -<br>6.49389<br>723282<br>7 | 1.56978<br>119118<br>8 | -<br>9.59853<br>931175<br>8 | -<br>3.38925<br>515389<br>6 |
| Flexion-<br>Extension<br>(Frontal axis)<br>max speed<br>(°/s)     | Equal<br>variances<br>assumed        | 2.160 | .144 | 4.49<br>2      | 148         | .000 | 25.8711<br>306044<br>0      | 5.75932<br>952384      | 14.4899<br>899842<br>1      | 37.2522<br>712245<br>9      |
|                                                                   | Equal<br>variances<br>not<br>assumed |       |      | 4.49<br>2      | 146.<br>304 | .000 | 25.8711<br>306044<br>0      | 5.75932<br>952384      | 14.4889<br>023047<br>1      | 37.2533<br>589040<br>9      |
| Flexion-<br>Extension<br>(Frontal axis)<br>min speed<br>(°/s)     | Equal<br>variances<br>assumed        | 2.258 | .135 | -<br>1.67<br>4 | 148         | .096 | -<br>8.19166<br>417280      | 4.89441<br>169410      | -<br>17.8636<br>212145<br>2 | 1.48029<br>286892           |
|                                                                   | Equal<br>variances<br>not<br>assumed |       |      | -<br>1.67<br>4 | 147.<br>298 | .096 | -<br>8.19166<br>417280      | 4.89441<br>169410      | -<br>17.8640<br>009369<br>1 | 1.48067<br>259131           |
| Flexion-<br>Extension<br>(Frontal axis)<br>Speed<br>Harmony (°/s) | Equal<br>variances<br>assumed        | .332  | .566 | 1.84<br>1      | 148         | .068 | .041698<br>362053           | .022647<br>495064      | -<br>.003055<br>862366      | .086452<br>586473           |
|                                                                   | Equal<br>variances<br>not<br>assumed |       |      | 1.84<br>1      | 147.<br>377 | .068 | .041698<br>362053           | .022647<br>495064      | -<br>.003057<br>421068      | .086454<br>145175           |
| Rotation<br>(Longitudinal<br>axis) total<br>length (°)            | Equal<br>variances<br>assumed        | 3.872 | .051 | 3.25<br>0      | 148         | .001 | 11.3378<br>383806<br>7      | 3.48844<br>740712      | 4.44423<br>899168           | 18.2314<br>377696<br>5      |
|                                                                   | Equal<br>variances<br>not<br>assumed |       |      | 3.25<br>0      | 141.<br>159 | .001 | 11.3378<br>383806<br>7      | 3.48844<br>740712      | 4.44148<br>411352           | 18.2341<br>926478<br>1      |

|                                                              |                                      |       |      |                |             |      |                             |                   |                             |                        |
|--------------------------------------------------------------|--------------------------------------|-------|------|----------------|-------------|------|-----------------------------|-------------------|-----------------------------|------------------------|
| Rotation<br>(Longitudinal<br>axis) angular<br>velocity (°/s) | Equal<br>variances<br>assumed        | 4.658 | .033 | 3.15<br>3      | 148         | .002 | 7.05140<br>816547           | 2.23622<br>287201 | 2.63235<br>784735           | 11.4704<br>584835<br>8 |
|                                                              | Equal<br>variances<br>not<br>assumed |       |      | 3.15<br>3      | 141.<br>402 | .002 | 7.05140<br>816547           | 2.23622<br>287201 | 2.63065<br>752515           | 11.4721<br>588057<br>9 |
| Rotation<br>(Longitudinal<br>axis) max<br>range (°)          | Equal<br>variances<br>assumed        | 1.777 | .185 | 4.05<br>2      | 148         | .000 | 9.32192<br>484733           | 2.30084<br>051068 | 4.77518<br>215995           | 13.8686<br>675347<br>1 |
|                                                              | Equal<br>variances<br>not<br>assumed |       |      | 4.05<br>2      | 141.<br>612 | .000 | 9.32192<br>484733           | 2.30084<br>051068 | 4.77349<br>085873           | 13.8703<br>588359<br>3 |
| Rotation<br>(Longitudinal<br>axis) max<br>value (°)          | Equal<br>variances<br>assumed        | 4.943 | .028 | 3.28<br>3      | 148         | .001 | 4.11371<br>887413           | 1.25302<br>184710 | 1.63759<br>421708           | 6.58984<br>353119      |
|                                                              | Equal<br>variances<br>not<br>assumed |       |      | 3.28<br>3      | 140.<br>940 | .001 | 4.11371<br>887413           | 1.25302<br>184710 | 1.63657<br>144383           | 6.59086<br>630443      |
| Rotation<br>(Longitudinal<br>axis) min<br>value (°)          | Equal<br>variances<br>assumed        | .124  | .726 | -<br>4.41<br>6 | 148         | .000 | -<br>5.20820<br>597413      | 1.17945<br>118913 | -<br>7.53894<br>599908      | -<br>2.87746<br>594918 |
|                                                              | Equal<br>variances<br>not<br>assumed |       |      | -<br>4.41<br>6 | 145.<br>258 | .000 | -<br>5.20820<br>597413      | 1.17945<br>118913 | -<br>7.53930<br>870499      | -<br>2.87710<br>324328 |
| Rotation<br>(Longitudinal<br>axis) max<br>speed (°/s)        | Equal<br>variances<br>assumed        | 3.794 | .053 | 2.91<br>5      | 148         | .004 | 13.3390<br>378814<br>7      | 4.57656<br>184819 | 4.29519<br>106984           | 22.3828<br>846930<br>9 |
|                                                              | Equal<br>variances<br>not<br>assumed |       |      | 2.91<br>5      | 142.<br>588 | .004 | 13.3390<br>378814<br>7      | 4.57656<br>184819 | 4.29236<br>055848           | 22.3857<br>152044<br>6 |
| Rotation<br>(Longitudinal<br>axis) min<br>speed (°/s)        | Equal<br>variances<br>assumed        | 5.912 | .016 | -<br>3.28<br>4 | 148         | .001 | -<br>14.3235<br>624956<br>0 | 4.36104<br>828428 | -<br>22.9415<br>281058<br>9 | -<br>5.70559<br>688531 |

|                                                              |                                      |       |      |                |             |      |                             |                        |                             |                         |
|--------------------------------------------------------------|--------------------------------------|-------|------|----------------|-------------|------|-----------------------------|------------------------|-----------------------------|-------------------------|
|                                                              | Equal<br>variances<br>not<br>assumed |       |      | -<br>3.28<br>4 | 140.<br>606 | .001 | -<br>14.3235<br>624956<br>0 | 4.36104<br>828428      | -<br>22.9452<br>650758<br>4 | -<br>5.70185<br>991536  |
| Rotation<br>(Longitudinal<br>axis) speed<br>harmony (°/s)    | Equal<br>variances<br>assumed        | .142  | .707 | -.957          | 148         | .340 | -<br>.021752<br>349427      | .022725<br>430573      | -<br>.066660<br>583959      | .023155<br>885105       |
|                                                              | Equal<br>variances<br>not<br>assumed |       |      | -.957          | 147.<br>987 | .340 | -<br>.021752<br>349427      | .022725<br>430573      | -<br>.066660<br>616321      | .023155<br>917468       |
| Laterization<br>(Sagittal axis)<br>Total Length<br>(°)       | Equal<br>variances<br>assumed        | 4.513 | .035 | 6.05<br>3      | 148         | .000 | 20.7205<br>211633<br>3      | 3.42301<br>759445      | 13.9562<br>190989<br>1      | 27.4848<br>232277<br>5  |
|                                                              | Equal<br>variances<br>not<br>assumed |       |      | 6.05<br>3      | 135.<br>495 | .000 | 20.7205<br>211633<br>3      | 3.42301<br>759445      | 13.9510<br>694144<br>3      | 27.4899<br>729122<br>4  |
| Laterization<br>(Sagittal axis)<br>angular<br>velocity (°/s) | Equal<br>variances<br>assumed        | 3.225 | .075 | 4.32<br>6      | 148         | .000 | 8.43931<br>054314<br>7      | 1.95074<br>561104<br>7 | 4.58439<br>826184<br>0      | 12.2942<br>228244<br>53 |
|                                                              | Equal<br>variances<br>not<br>assumed |       |      | 4.32<br>6      | 134.<br>725 | .000 | 8.43931<br>054314<br>7      | 1.95074<br>561104<br>7 | 4.58126<br>476129<br>7      | 12.2973<br>563249<br>97 |
| Laterization<br>(Sagittal axis)<br>max range (°)             | Equal<br>variances<br>assumed        | 1.471 | .227 | 6.52<br>7      | 148         | .000 | 15.3110<br>833628<br>0      | 2.34590<br>067625      | 10.6752<br>962686<br>7      | 19.9468<br>704569<br>3  |
|                                                              | Equal<br>variances<br>not<br>assumed |       |      | 6.52<br>7      | 139.<br>684 | .000 | 15.3110<br>833628<br>0      | 2.34590<br>067625      | 10.6730<br>201750<br>6      | 19.9491<br>465505<br>4  |
| Laterization<br>(Sagittal axis)<br>max value (°)             | Equal<br>variances<br>assumed        | .668  | .415 | 6.72<br>7      | 148         | .000 | 8.23579<br>585240           | 1.22423<br>394931      | 5.81655<br>960772           | 10.6550<br>320970<br>8  |
|                                                              | Equal<br>variances<br>not<br>assumed |       |      | 6.72<br>7      | 143.<br>137 | .000 | 8.23579<br>585240           | 1.22423<br>394931      | 5.81588<br>191585           | 10.6557<br>097889<br>5  |

|                                                           |                                      |       |      |                |             |      |                             |                        |                             |                             |
|-----------------------------------------------------------|--------------------------------------|-------|------|----------------|-------------|------|-----------------------------|------------------------|-----------------------------|-----------------------------|
| Laterization<br>(Sagittal axis)<br>min value (°)          | Equal<br>variances<br>assumed        | 1.884 | .172 | -<br>5.73<br>8 | 148         | .000 | -<br>7.07528<br>750908<br>0 | 1.23304<br>732887<br>5 | -<br>9.51194<br>007136<br>0 | -<br>4.63863<br>494680<br>0 |
|                                                           | Equal<br>variances<br>not<br>assumed |       |      | -<br>5.73<br>8 | 139.<br>067 | .000 | -<br>7.07528<br>750908<br>0 | 1.23304<br>732887<br>5 | -<br>9.51323<br>086602<br>5 | -<br>4.63734<br>415213<br>5 |
| Laterization<br>(Sagittal axis)<br>max speed<br>(°/s)     | Equal<br>variances<br>assumed        | 2.423 | .122 | 4.19<br>7      | 148         | .000 | 15.7496<br>230312<br>0      | 3.75245<br>263298      | 8.33431<br>697695           | 23.1649<br>290854<br>5      |
|                                                           | Equal<br>variances<br>not<br>assumed |       |      | 4.19<br>7      | 139.<br>087 | .000 | 15.7496<br>230312<br>0      | 3.75245<br>263298      | 8.33039<br>816527           | 23.1688<br>478971<br>3      |
| Laterization<br>(Sagittal axis)<br>min speed<br>(°/s)     | Equal<br>variances<br>assumed        | .865  | .354 | -<br>4.21<br>3 | 148         | .000 | -<br>15.4286<br>245985<br>3 | 3.66201<br>563957      | -<br>22.6652<br>160758<br>5 | -<br>8.19203<br>312122      |
|                                                           | Equal<br>variances<br>not<br>assumed |       |      | -<br>4.21<br>3 | 142.<br>767 | .000 | -<br>15.4286<br>245985<br>3 | 3.66201<br>563957      | -<br>22.6674<br>030684<br>3 | -<br>8.18984<br>612864      |
| Laterization<br>(Sagittal axis)<br>speed<br>harmony (°/s) | Equal<br>variances<br>assumed        | 1.300 | .256 | .886           | 148         | .377 | .021356<br>518413           | .024102<br>741095      | -<br>.026273<br>450423      | .068986<br>487250           |
|                                                           | Equal<br>variances<br>not<br>assumed |       |      | .886           | 147.<br>595 | .377 | .021356<br>518413           | .024102<br>741095      | -<br>.026274<br>529089      | .068987<br>565915           |



**Table S4.** Independent Samples Effect Sizes

| Independent Samples Effect Sizes                        |                    |                           |                |                         |       |
|---------------------------------------------------------|--------------------|---------------------------|----------------|-------------------------|-------|
|                                                         |                    | Standardizer <sup>a</sup> | Point Estimate | 95% Confidence Interval |       |
|                                                         |                    |                           |                | Lower                   | Upper |
| Flexion-Extension (Frontal axis) total length (°)       | Cohen's d          | 25.0699675959<br>6        | .694           | .363                    | 1.023 |
|                                                         | Hedges' correction | 25.1979119076<br>2        | .690           | .361                    | 1.017 |
|                                                         | Glass's delta      | 24.9852519565<br>4        | .696           | .355                    | 1.033 |
| Flexion-Extension (Frontal axis) angular velocity (°/s) | Cohen's d          | 13.2727736342<br>95       | .472           | .146                    | .795  |
|                                                         | Hedges' correction | 13.3405110926<br>66       | .469           | .146                    | .791  |
|                                                         | Glass's delta      | 14.5665846236<br>93       | .430           | .101                    | .756  |
| Flexion-Extension (Frontal axis) max range (°)          | Cohen's d          | 17.0834431982<br>3        | .725           | .394                    | 1.055 |
|                                                         | Hedges' correction | 17.1706283679<br>8        | .722           | .392                    | 1.049 |
|                                                         | Glass's delta      | 17.8517165714<br>3        | .694           | .353                    | 1.031 |
| Flexion-Extension (Frontal axis) max value (°)          | Cohen's d          | 12.6149227062<br>9        | .523           | .197                    | .848  |
|                                                         | Hedges' correction | 12.6793028294<br>8        | .521           | .196                    | .844  |
|                                                         | Glass's delta      | 14.2363100734<br>5        | .464           | .134                    | .791  |
| Flexion-Extension (Frontal axis) min value (°)          | Cohen's d          | 9.61290731557<br>1        | -.676          | -1.004                  | -.345 |
|                                                         | Hedges' correction | 9.66196668530<br>5        | -.672          | -.999                   | -.344 |
|                                                         | Glass's delta      | 7.94785597779<br>7        | -.817          | -1.161                  | -.469 |
| Flexion-Extension (Frontal axis) max speed (°/s)        | Cohen's d          | 35.2685464848<br>8        | .734           | .402                    | 1.063 |

|                                                      |                    |                |       |        |       |
|------------------------------------------------------|--------------------|----------------|-------|--------|-------|
|                                                      | Hedges' correction | 35.44853913488 | .730  | .400   | 1.058 |
|                                                      | Glass's delta      | 37.11871218411 | .697  | .356   | 1.034 |
| Flexion-Extension (Frontal axis) min speed (°/s)     | Cohen's d          | 29.97202810414 | -.273 | -.594  | .049  |
|                                                      | Hedges' correction | 30.12499002921 | -.272 | -.591  | .048  |
|                                                      | Glass's delta      | 30.98899760357 | -.264 | -.586  | .059  |
| Flexion-Extension (Frontal axis) Speed Harmony (°/s) | Cohen's d          | .138687017147  | .301  | -.022  | .622  |
|                                                      | Hedges' correction | .139394804856  | .299  | -.022  | .619  |
|                                                      | Glass's delta      | .143123430425  | .291  | -.033  | .614  |
| Rotation (Longitudinal axis) total length (°)        | Cohen's d          | 21.36229035492 | .531  | .204   | .856  |
|                                                      | Hedges' correction | 21.47131257541 | .528  | .203   | .851  |
|                                                      | Glass's delta      | 23.59679801473 | .480  | .150   | .808  |
| Rotation (Longitudinal axis) angular velocity (°/s)  | Cohen's d          | 13.69401246893 | .515  | .189   | .839  |
|                                                      | Hedges' correction | 13.76389971519 | .512  | .188   | .835  |
|                                                      | Glass's delta      | 15.10079538200 | .467  | .137   | .794  |
| Rotation (Longitudinal axis) max range (°)           | Cohen's d          | 14.08971307675 | .662  | .332   | .989  |
|                                                      | Hedges' correction | 14.16161977683 | .658  | .330   | .984  |
|                                                      | Glass's delta      | 15.51400726869 | .601  | .265   | .933  |
| Rotation (Longitudinal axis) max value (°)           | Cohen's d          | 7.67316040491  | .536  | .209   | .861  |
|                                                      | Hedges' correction | 7.71232029702  | .533  | .208   | .857  |
|                                                      | Glass's delta      | 8.48850029151  | .485  | .154   | .812  |
| Rotation (Longitudinal axis) min value (°)           | Cohen's d          | 7.22263397469  | -.721 | -1.050 | -.390 |
|                                                      | Hedges' correction | 7.25949460998  | -.717 | -1.045 | -.388 |

|                                                     |                    |                 |       |        |       |
|-----------------------------------------------------|--------------------|-----------------|-------|--------|-------|
|                                                     | Glass's delta      | 7.70283269705   | -.676 | -1.012 | -.336 |
| Rotation (Longitudinal axis) max speed (°/s)        | Cohen's d          | 28.02560326091  | .476  | .151   | .800  |
|                                                     | Hedges' correction | 28.16863162759  | .474  | .150   | .796  |
|                                                     | Glass's delta      | 30.63426996251  | .435  | .106   | .762  |
| Rotation (Longitudinal axis) min speed (°/s)        | Cohen's d          | 26.70585760030  | -.536 | -.861  | -.210 |
|                                                     | Hedges' correction | 26.84215065910  | -.534 | -.857  | -.209 |
|                                                     | Glass's delta      | 29.60993768489  | -.484 | -.812  | -.153 |
| Rotation (Longitudinal axis) speed harmony (°/s)    | Cohen's d          | .139164272721   | -.156 | -.477  | .165  |
|                                                     | Hedges' correction | .139874496099   | -.156 | -.474  | .164  |
|                                                     | Glass's delta      | .139813361347   | -.156 | -.476  | .166  |
| Laterization (Sagittal axis) Total Length (°)       | Cohen's d          | 20.96161621741  | .988  | .648   | 1.326 |
|                                                     | Hedges' correction | 21.06859360172  | .983  | .644   | 1.320 |
|                                                     | Glass's delta      | 23.93475987780  | .866  | .514   | 1.212 |
| Laterization (Sagittal axis) angular velocity (°/s) | Cohen's d          | 11.945828412595 | .706  | .375   | 1.035 |
|                                                     | Hedges' correction | 12.006793820210 | .703  | .373   | 1.030 |
|                                                     | Glass's delta      | 13.692978735897 | .616  | .279   | .949  |
| Laterization (Sagittal axis) max range (°)          | Cohen's d          | 14.36564911018  | 1.066 | .722   | 1.407 |
|                                                     | Hedges' correction | 14.43896404686  | 1.060 | .718   | 1.399 |
|                                                     | Glass's delta      | 16.02268927451  | .956  | .598   | 1.308 |
| Laterization (Sagittal axis) max value (°)          | Cohen's d          | 7.49687125402   | 1.099 | .753   | 1.441 |
|                                                     | Hedges' correction | 7.53513145633   | 1.093 | .749   | 1.433 |
|                                                     | Glass's delta      | 8.15858808119   | 1.009 | .648   | 1.366 |

|                                                     |                    |                |       |        |       |
|-----------------------------------------------------|--------------------|----------------|-------|--------|-------|
| Laterization (Sagittal axis)<br>min value (°)       | Cohen's d          | 7.550841961114 | -.937 | -1.273 | -.598 |
|                                                     | Hedges' correction | 7.589377602353 | -.932 | -1.266 | -.595 |
|                                                     | Glass's delta      | 8.453715272320 | -.837 | -1.182 | -.487 |
| Laterization (Sagittal axis)<br>max speed (°/s)     | Cohen's d          | 22.97898558692 | .685  | .355   | 1.014 |
|                                                     | Hedges' correction | 23.09625859424 | .682  | .353   | 1.009 |
|                                                     | Glass's delta      | 25.72353547178 | .612  | .276   | .945  |
| Laterization (Sagittal axis)<br>min speed (°/s)     | Cohen's d          | 22.42517436758 | -.688 | -1.016 | -.357 |
|                                                     | Hedges' correction | 22.53962100526 | -.685 | -1.011 | -.356 |
|                                                     | Glass's delta      | 24.47786501594 | -.630 | -.964  | -.293 |
| Laterization (Sagittal axis)<br>speed harmony (°/s) | Cohen's d          | .147598542716  | .145  | -.176  | .465  |
|                                                     | Hedges' correction | .148351810301  | .144  | -.175  | .463  |
|                                                     | Glass's delta      | .143678263342  | .149  | -.173  | .469  |

a. The denominator used in estimating the effect sizes.

Cohen's d uses the pooled standard deviation.

Hedges' correction uses the pooled standard deviation, plus a correction factor.

Glass's delta uses the sample standard deviation of the control group.
